# Supplementary material for: The use of brain tissue mechanics for time since death estimations
Source: Int J Legal Med. 2023 Aug 16;137(6):1897–906. doi: 10.1007/s00414-023-03068-0 (PMC10567939; doi:10.1007/s00414-023-03068-0)
Supplement: Supplementary file 1 — Supplementary file1 (XLSX 12 KB) [file 414_2023_3068_MOESM1_ESM.xlsx]

## Sheet: Table 1
Storage modulus	0 vs. 1	0 vs. 2	0 vs. 3	0 vs. 4	1 vs. 2	1 vs. 3	1 vs. 4	2 vs. 3	2 vs. 4	3 vs. 4
FL	0.008	<0.001	<0.001	-	ns	ns	-	ns	-	-
ADB	0.023	<0.001	<0.001	<0.001	ns	ns	0.002	ns	ns	ns
PDB	ns	0.027	<0.001	<0.001	ns	ns	0.01	ns	0.044	ns
PL	ns	<0.001	<0.001	<0.001	ns	0.002	<0.001	ns	0.005	ns
M&P	ns	ns	<0.001	0.001	ns	ns	ns	ns	ns	ns
CB	<0.001	<0.001	<0.001	-	ns	ns	-	ns	-	-
SC	0.024	ns	-	-	ns	-	-	-	-	-
Loss modulus	0 vs. 1	0 vs. 2	0 vs. 3	0 vs. 4	1 vs. 2	1 vs. 3	1 vs. 4	2 vs. 3	2 vs. 4	3 vs. 4
FL	0.031	0.007	0.001	-	ns	ns	-	ns	-	-
ADB	0.019	0.001	<0.001	<0.001	ns	ns	0.048	ns	ns	ns
PDB*	ns	ns	0.005	0.005	ns	ns	ns	ns	ns	ns
PL	ns	ns	0.009	<0.001	ns	ns	0.022	ns	ns	ns
M&P*	ns	ns	0.05	ns	ns	ns	ns	ns	ns	ns
CB*	<0.001	0.006	0.005	-	ns	ns	-	ns	-	-
SC	0.042	ns	-	-	ns	-	-	-	-	-
Complex shear modulus	0 vs. 1	0 vs. 2	0 vs. 3	0 vs. 4	1 vs. 2	1 vs. 3	1 vs. 4	2 vs. 3	2 vs. 4	3 vs. 4
FL	0.009	<0.001	<0.001	-	ns	ns	-	ns	-	-
ADB	0.016	<0.001	<0.001	<0.001	ns	ns	0.003	ns	ns	ns
PDB	ns	0.022	<0.001	<0.001	ns	ns	0.011	ns	0.039	ns
PL	ns	<0.001	<0.001	<0.001	ns	0.003	<0.001	ns	0.007	ns
M&P	ns	ns	<0.001	0.002	ns	ns	ns	ns	ns	ns
CB	<0.001	<0.001	<0.001	-	ns	ns	-	ns	-	-
SC	0.024	ns	-	-	ns	-	-	-	-	-
Supplementary Table 1. The p-values of the intra-group comparisons of the storage moduli, loss moduli and complex shear moduli between the testing days for each region: ns, non-significant result (p > 0.05); minus sign (-), insufficient data points for statistical comparison (n < 6). ADB, anterior deep brain; CB, cerebellum; FL, frontal lobe; M&P, pooled medulla and pons; PDB, posterior deep brai…
